# Supplementary material for: Bootstrap inference for multiple imputation under uncongeniality and misspecification
Source: PubMed Central journal article supplement (PMC7682506; doi:10.1177/0962280220932189), 2020-06-30
Supplement: sj-pdf-1-smm-10.1177_0962280220932189.pdf [file sj-pdf-1-smm-10.1177_0962280220932189.pdf]

## **Appendix**

In this appendix we sketch an argument for why percentile based bootstrap confidence intervals over-cover with small values of  $M$ . To simplify the argument,

we will assume that the bootstrap distributions of estimates are normal. Consider first Boot MI with  $M = \infty$ . Following equation (8), and assuming the bootstrap distribution is normal, conditional on  $Z_{\text{obs}}$  this distribution will be  $N(\bar{\theta}_\infty, \sigma_\infty^2(Z_{\text{obs}}))$ . If the bootstrap distribution is normal, the percentile interval is equal (with  $B = \infty$ ) to  $\bar{\theta}_\infty \pm z_{0.975} \sqrt{\sigma_\infty^2(Z_{\text{obs}})}$ . Suppose that this confidence interval, in repeated samples, has correct coverage.

Now consider the same procedure with small finite  $M$ . Following equation (8), conditional on  $Z_{\text{obs}}$ , the bootstrap distribution of estimates is now  $N\left(\bar{\theta}_\infty, \sigma_\infty^2(Z_{\text{obs}}) + \frac{\sigma_{\text{btw}}^2(Z_{\text{obs}})}{M}\right)$ . The resulting boot MI percentile confidence interval (with  $B = \infty$ ) is then  $\bar{\theta}_\infty \pm z_{0.975} \sqrt{\sigma_\infty^2(Z_{\text{obs}}) + \frac{\sigma_{\text{btw}}^2(Z_{\text{obs}})}{M}}$ .

The lower limit of this interval is then less than the lower limit of the interval with  $M = \infty$ , and the upper limit is larger than the upper limit of the interval with  $M = \infty$ . Hence if the interval with  $M = \infty$  has correct coverage, when  $M$  is finite the percentile interval must over-cover. Note that this argument does not apply to a normal based  $B = \infty$  Boot MI interval, because this interval is constructed as  $\bar{\theta}_M \pm z_{0.975} \sqrt{\sigma_\infty^2(Z_{\text{obs}}) + \frac{\sigma_{\text{btw}}^2(Z_{\text{obs}})}{M}}$ .

# Supplementary Material: Bootstrap Inference for Multiple Imputation Under Uncongeniality

Jonathan W. Bartlett  
j.w.bartlett@bath.ac.uk

Rachael Hughes  
Rachael.Hughes@bristol.ac.uk

May 14, 2020

Table 1: Parameter values for the Hughes *et al* simulation study.

| Parameter  | Value(s)                                 |
|------------|------------------------------------------|
| $\pi$      | 0.4577                                   |
| $\alpha_0$ | (25.02, 1.774)                           |
| $\alpha_1$ | (-0.03616, -0.1336)                      |
| $\Sigma$   | (0.5521, 0.001574<br>0.001574, 0.003705) |
| $\iota_0$  | -32.98                                   |
| $\iota_1$  | -2.314                                   |
| $\iota_2$  | -0.01566                                 |
| $\iota_3$  | 65.38                                    |
| $\lambda$  | 12.29                                    |
| $\beta_0$  | 1.854                                    |
| $\beta_1$  | 0.2908                                   |
| $\beta_2$  | 0.08003                                  |
| $\beta_3$  | 0.01119                                  |
| $\omega$   | 0.7887                                   |
| $\eta$     | 0.5                                      |
